# Supplementary material for: Paxillin promotes colorectal tumor invasion and poor patient outcomes via ERK-mediated stabilization of Bcl-2 protein by phosphorylation at Serine 87
Source: PubMed Central journal article supplement (PMC4496177; doi:10.18632/oncotarget.3537), 2015-03-12
Supplement: oncotarget-06-8698-s001.pdf [file oncotarget-06-8698-s001.pdf]

## Paxillin promotes colorectal tumor invasion and poor patient outcomes via ERK-mediated stabilization of Bcl-2 protein by phosphorylation at Serine 87

### Supplementary Material

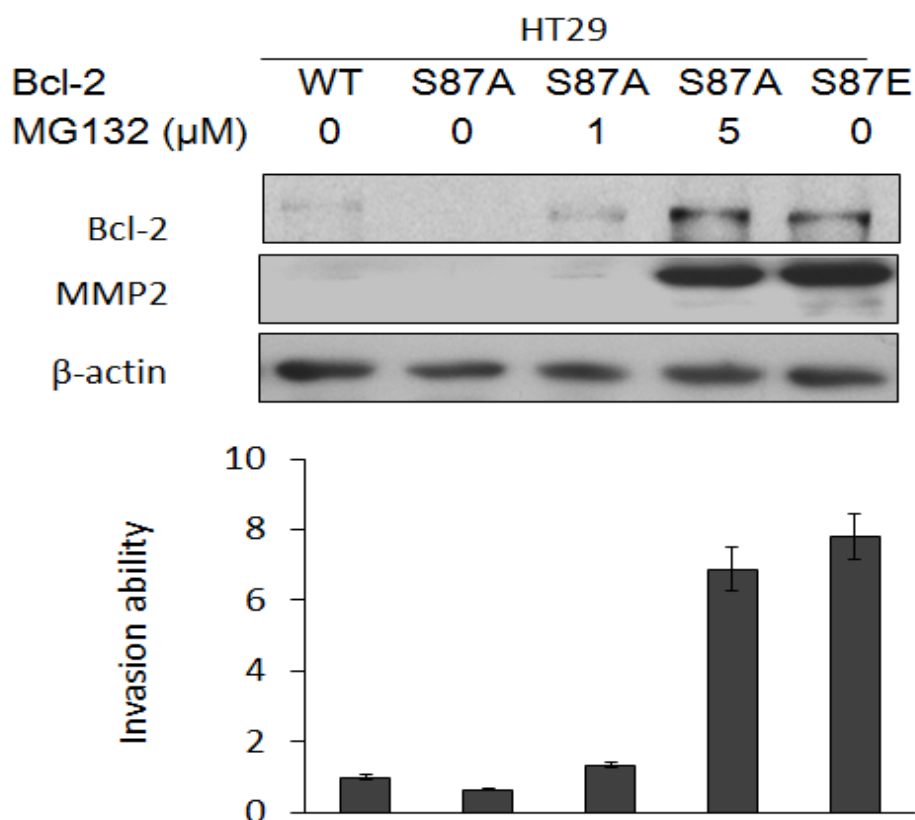

**Supplementary Figure 1:** HT29 cells were transfected with WT-Bcl-2 or mutant Bcl-2-S87A and Bcl-2-S87E and then treated with 0~5  $\mu$ mol/L MG132 for an additional 5 hours. The cells were analyzed cell invasion capability by matrigel invasion assay.
